# Supplementary material
Source: HighWire-hosted journal article supplement (https://bmjopenquality.bmj.com/highwire/filestream/142800/field_highwire_adjunct_files/3/bmjoq-2019-000833supp004_data_supplement.pdf)
Supplement: bmjoq-2019-000833supp004_data_supplement.pdf [file bmjoq-2019-000833supp004_data_supplement.pdf]

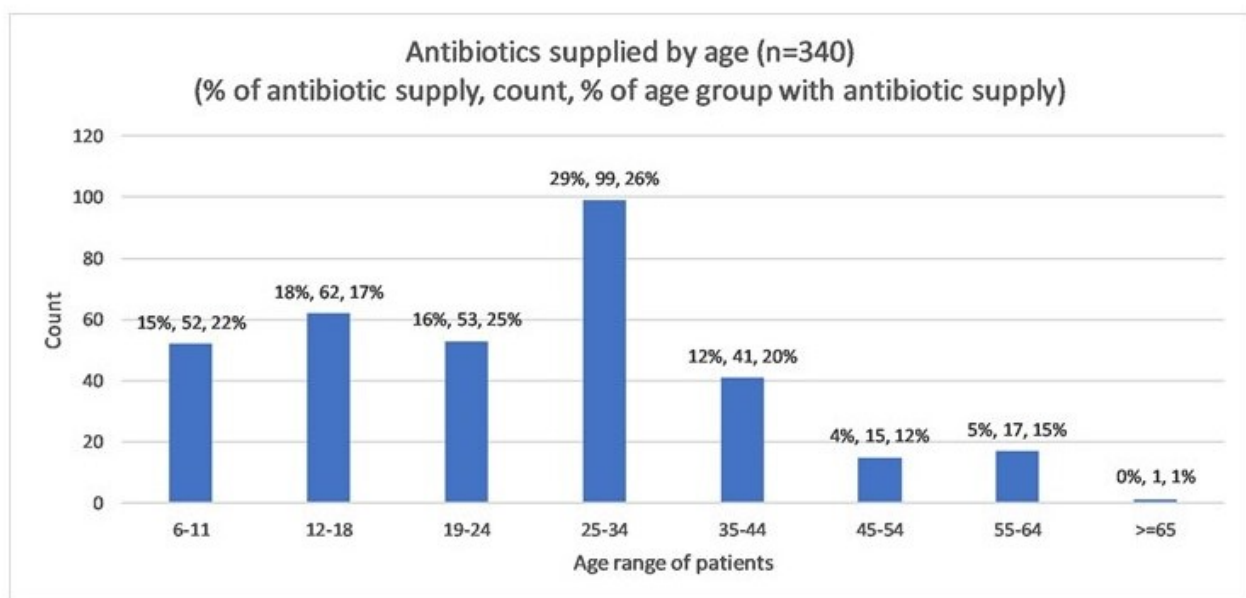

**Supplementary Figure 2:** Number and percentage of antibiotics supplied during Sore Throat Test and Treat (STTT) consultation, by age group of patients. The percentage of antibiotic supply for each age group in relation to total population in that age group is also presented.
